# Supplementary material
Source: PubMed Central journal article supplement (PMC5472351)
Supplement: NIHMS856985-supplement-Supplemental_File_1.pdf [file NIHMS856985-supplement-Supplemental_File_1.pdf]

## SUPPORTING INFORMATION

### **Behavioral profiling of multiple pairs of rats selectively bred for high and low alcohol intake using the MCSF test**

**Erika Roman<sup>1,2,\*</sup>; Robert B Stewart<sup>2</sup>; Megan L Bertholomey<sup>2</sup>; Meredith L Jensen<sup>2</sup>; Giancarlo Colombo<sup>3</sup>; Petri Hyytiä<sup>4</sup>; Nancy E Badia-Elder<sup>2</sup>; Nicholas J Grahame<sup>2</sup>; Ting-Kai Li<sup>5</sup>; Lawrence Lumeng<sup>6</sup>**

Schools of Medicine and Science, Indiana University Purdue University at Indianapolis, Indianapolis, USA

(1) Department of Pharmaceutical Biosciences, Uppsala University, Uppsala, Sweden

(2) Department of Psychology, Indiana University Purdue University at Indianapolis, Indianapolis, IN, USA

(3) CNR Institute of Neuroscience, Cagliari, Italy

(4) Institute of Biomedicine/Pharmacology, University of Helsinki, Helsinki, Finland

(5) Department of Psychiatry, Duke University Medical Center, Durham, NC, USA

(6) Department of Medicine, Indiana University Purdue University at Indianapolis, Indianapolis, IN, USA

\* Corresponding author:

Erika Roman

Department of Pharmaceutical Biosciences, Division of Pharmacology, Uppsala University, P.O. Box 591, SE-751 24 Uppsala, Sweden. Phone: +46-18-4714632; Fax: +46-18-4714253; E-mail: Erika.Roman@farmbio.uu.se

## **EXPANDED MATERIAL AND METHODS**

### **Procedure**

The rats were handled during the week before testing began. The handling procedure was similar to that of previous experiments (Roman and Colombo, 2009; Roman et al., 2007) and consisted of individual tail marking, handling, weighing, and adaptation to the transportation bucket that was used to take the animals from the home cage to the testing rooms. The animals were 12–14 weeks old when the behavioral testing started. All testing was conducted during the period of September – October. The MCSF was the main test for this investigation. The OF and EPM tests served as reference tests to permit comparisons with other studies. In accordance with previous experiments, (Roman et al., 2007) each animal was tested only once in each of the three tests over three consecutive days with the MCSF test completed on the first day, the OF test on the second, and finally the EPM test on the third day. The sequential order of the three tests was based on a pilot study in which it was shown that the MCSF test was most sensitive to previous experience and should be performed as the first test in order to reduce the likelihood of any carry-over effects (Augustsson, 2004). The rats were tested using a counterbalanced running schedule to avoid time of day and order biases and tested in the following order: AA/ANA, P/NP, HAD1-2/LAD1-2 and N/Nih, and sP/sNP and Wistar. All testing was performed in a room separate from the housing room, with a masking background noise. The conditions in the testing room were similar with regard to temperature and humidity to those in the animal room. The illumination in each specific test is given below. The animal to be tested was transferred in a bucket from the home cage to the respective apparatus. After each test, the test apparatus was wiped with a cloth containing 10% alcohol solution and sufficient time was allowed to dry before the next animal was placed in the test. All behavioral observations were carried out during the dark period of the light/dark cycle.

### **The MCSF test**

The MCSF test has been described in detail elsewhere (Meyerson et al., 2006; Roman and Colombo, 2009). The MCSF arena (Fig. 1) used in the present study was similar to the rat arena used in other studies (Alsiö et al., 2009; Roman and Colombo, 2009). AA and ANA rats have previously been tested using a smaller arena (Roman et al., 2007), which today is used for mice (Wallén-Mackenzie et al., 2009). The apparatus consists of a square field (100 x 100 cm) with a smaller square field (70 x 70 cm) located in the center of the larger one. The walls are 25 cm high except for the walls surrounding the BRIDGE (see below), which are 40 cm high. The arena is divided into zones, which forms the basis of the description and the

variables of the animals' performance in this test. The defined zones (Fig. 1) were: CENTER, the center field of the arena; CORRIDORs, the corridors surrounding the center field; DCR, the dark corner room where the animal can seek shelter; HURDLE, a high passage to a hole board with a photocell device located under the hole board floor, allowing recording of head dips into the holes; BRIDGE, the elevated and illuminated bridge construction, associated with risk-taking behavior; SLOPE, the slope leading up to the BRIDGE, associated with risk assessment; BRIDGE ENTRANCE, the initial part of the BRIDGE used as an additional risk-assessment area; CENTRAL CIRCLE, the circular zone (diameter 25 cm) in the middle of the CENTER, used for assessment of risk-taking behavior in the central part of CENTER versus thigmotaxis. The sum of frequencies to the three CORRIDORs (FRQ TOTCORR) and to all zones (TOTACT) was used for assessment of general locomotor activity. The total time spent in the three CORRIDORs was given the denomination DUR TOTCORR. An operational categorization of the various parameters generated from the MCSF with regard to function is used in the interpretation of results (Roman and Colombo, 2009). The shelter/risk index is calculated from the difference in time spent in the dark corner room (DCR) and on the BRIDGE, relative to the total time spent in the two zones and is used as one way of interpreting anxiety-like behavior. A positive value indicates that the animals spent more time in the DCR than on the BRIDGE and is interpreted as higher anxiety-like behavior. The SLOPE/BRIDGE interval reveals how long time it takes the animals to enter the BRIDGE in relation to first entering the SLOPE and is here used as one way of interpreting impulsive-like behavior. Thus, a value close to zero indicates less risk assessment and a fast risk-taking response.

### **The OF test**

The OF arena consisted of a brown painted square field (90 x 90 cm with 30 cm high walls). White lines divided the arena into a 6 x 6 array of small squares (15 x 15 cm) used to score number of crossings. Duration and frequency of visits into a peripheral zone, 15 cm from each of the four walls of the arena (the width of one of the small squares) was used for assessment of thigmotaxis whereas duration and frequency of visits into the central part (60 x 60 cm) revealed center activity. Thus, the center portions of the OF and MCSF were of different shapes and relative sizes. The total number of lines crossed (CROSSINGS) and the sum of visits to the periphery and center (TOTACT) were used as measures of general locomotor activity. Each rat was released in the peripheral zone and the test session lasted 10 min.

### **The EPM test**

The EPM apparatus (AccuScan, Columbus, OH) was white acrylic plastic and consisted of two open arms (50 x 10 cm) at right angles to two wall-enclosed and covered arms (50 x 10 x 50 cm). The apparatus was raised 90 cm off the floor. The behavior on the open and closed arms, and in the center was recorded. The sum of visits to the open and closed arms (TOTACT) was used for assessment of general locomotor activity. Each rat was released in the center of the EPM facing an open arm and the test session lasted 5 min.

### **Behavioral recordings**

The animals were monitored by video cameras. In the MCSF test, the numbers of stretched attend postures (SAPs; from the CORRIDORS into the CENTER and from the CORRIDOR into the SLOPE) and rearings were recorded by direct observation, and the number of head dips into the hurdle hole board of the MCSF was noted. The observer watched remotely via a video monitor from a room adjacent to the one in which the test apparatus was located.

Manual scoring of the videotaped behavior in the MCSF, OF and the EPM tests was performed using the Observer XT 8.0 (Noldus Information Technology, Wageningen, the Netherlands). Visits to the defined zones were only scored as such if both hind legs had crossed over into that section. The latency (LAT, s) of first visiting a zone, frequency (FRQ) of visits, and duration (DUR, s) of time spent in a certain zone, and also the number of animals visiting each zone (OCCURRENCE) were registered for the defined zones in the respective test. The mean duration per visit to a zone (DUR/FRQ, s), the percentage duration and the percentage number of visits in each zone (in the MCSF and EPM) were calculated.

When an animal did not enter a zone this was considered to be a missing value in the statistical analysis, except for the comparisons of percentage number of visits to each zone (in the MCSF and EPM tests) and percentage duration of time spent in each zone.

**Supporting Table 1.** Results from the multivariate concentric square field™ (MCSF) test in adult male Alko, alcohol (AA) and Alko, non-alcohol (ANA) rats.

| Functional categories   | Parameters              | AA           | ANA          |             |
|-------------------------|-------------------------|--------------|--------------|-------------|
| General activity        | TOTACT                  | 84.7 ± 5.7   | 118.4 ± 12.0 | *           |
|                         | FRQ TOTCORR             | 23.5 ± 2.1   | 37.6 ± 4.0   | *           |
|                         | FRQ CENTER              | 23.1 ± 1.3   | 21.6 ± 2.5   |             |
|                         | DUR CENTER              | 396.8 ± 41.6 | 214.7 ± 47.9 | ***         |
|                         | DUR/FRQ CENTER          | 17.6 ± 2.0   | 10.6 ± 1.6   | *           |
| Exploratory activity    | LAT LEAVE               | 99.7 ± 35.9  | 18.2 ± 3.0   | ****        |
|                         | DUR TOTCORR             | 390.0 ± 17.7 | 417.1 ± 31.4 |             |
|                         | DUR/FRQ TOTCORR         | 18.4 ± 2.1   | 13.0 ± 2.0   | *           |
|                         | LAT HURDLE              | 207.5 ± 41.0 | 76.0 ± 8.0   | **          |
|                         | FRQ HURDLE              | 5.4 ± 0.7    | 9.8 ± 1.0    | **          |
|                         | DUR HURDLE              | 93.8 ± 9.6   | 102.2 ± 10.8 |             |
|                         | DUR/FRQ HURDLE          | 19.2 ± 2.7   | 10.4 ± 0.5   | **          |
|                         | OCC HURDLE              | 10/12        | 11/12        |             |
|                         | PHOTOCELL COUNTS        | 3.3 ± 0.7    | 6.0 ± 0.9    | *           |
|                         | # ZONES VISITED         | 9.5 ± 0.3    | 9.4 ± 0.6    |             |
|                         | OCC VIST ALL ZONES      | 10/12        | 11/12        |             |
|                         | REARING                 | 73.8 ± 2.6   | 78.6 ± 8.7   |             |
| Risk assessment         | LAT SLOPE               | 303.9 ± 81.4 | 82.7 ± 11.9  | *           |
|                         | FRQ SLOPE               | 8.0 ± 1.1    | 15.2 ± 1.6   | **          |
|                         | DUR SLOPE               | 46.3 ± 6.2   | 54.5 ± 8.5   |             |
|                         | DUR/FRQ SLOPE           | 6.0 ± 0.5    | 3.4 ± 0.4    | ***         |
|                         | OCC SLOPE               | 12/12        | 11/12        |             |
|                         | LAT BRIDGE ENTRANCE     | 338.5 ± 82.3 | 98.2 ± 15.7  | *           |
|                         | FRQ BRIDGE ENTRANCE     | 8.9 ± 1.4    | 15.8 ± 1.8   | **          |
|                         | DUR BRIDGE ENTRANCE     | 65.8 ± 14.1  | 64.7 ± 10.7  |             |
|                         | DUR/FRQ BRIDGE ENTRANCE | 7.4 ± 1.7    | 4.1 ± 0.6    | *           |
|                         | OCC BRIDGE ENTRANCE     | 12/12        | 11/12        |             |
|                         | SAP TO CENTER           | - ± -        | - ± -        |             |
|                         | OCC SAP CENTER          | 1/12         | 2/12         |             |
|                         | SAP TO SLOPE            | 0.7 ± 0.3    | 0.7 ± 0.3    |             |
|                         | OCC SAP TO SLOPE        | 12/12        | 11/12        |             |
|                         | Risk taking             | LAT BRIDGE   | 341.0 ± 82.4 | 99.5 ± 15.7 |
| FRQ BRIDGE              |                         | 4.5 ± 0.7    | 8.2 ± 0.9    | **          |
| DUR BRIDGE              |                         | 161.3 ± 29.7 | 188.8 ± 33.1 |             |
| DUR/FRQ BRIDGE          |                         | 33.0 ± 3.4   | 21.9 ± 2.3   | *           |
| OCC BRIDGE              |                         | 12/12        | 11/12        |             |
| LAT CTRCI               |                         | 122.3 ± 40.5 | 134.9 ± 53.5 |             |
| FRQ CTRCI               |                         | 9.4 ± 0.8    | 6.8 ± 1.6    | *           |
| DUR CTRCI               |                         | 19.3 ± 4.2   | 12.9 ± 8.6   | **          |
| DUR/FRQ CTRCI           |                         | 1.9 ± 0.3    | 1.2 ± 0.3    | **          |
| Shelter seeking         | LAT DCR                 | 291.0 ± 47.1 | 86.8 ± 36.5  | ***         |
|                         | FRQ DCR                 | 3.3 ± 0.3    | 7.6 ± 1.0    | ***         |
|                         | DUR DCR                 | 50.5 ± 8.9   | 179.2 ± 59.0 | *           |
|                         | DUR/FRQ DCR             | 15.1 ± 2.1   | 25.3 ± 9.7   |             |
|                         | OCC DCR                 | 10/12        | 12/12        |             |
| Other                   | BODY WEIGHT             | 313.3 ± 5.3  | 379.8 ± 8.5  | ****        |
| Anxiety-like behavior   | DUR SHELTER/RISK INDEX  | -0.49 ± 0.14 | -0.18 ± 0.16 |             |
| Impulsive-like behavior | SLOPE/BRIDGE INTERVAL   | -0.26 ± 0.22 | -0.28 ± 0.23 |             |

Behavioral parameters recorded during the 20-min trial of the MCSF test. Values represent mean  $\pm$  SEM. Occurrence (OCC) is shown for the zones that were not visited by all animals in each group or the behaviors that were not performed by all animals in each group (n = 12 rats/group). No values are shown if OCC  $\leq$  3 animals. \*p  $\leq$  0.05, \*\*p < 0.01, \*\*\*p < 0.001, \*\*\*\*p < 0.0001 comparing AA and ANA rats (Mann-Whitney U-test); #p  $\leq$  0.05, ##p < 0.01, ###p < 0.001 comparing AA and ANA rats (Chi-Square test).

*Abbreviations:* CTRCI, central circle; DCR, dark corner room; DUR, duration (s); DUR/FRQ, duration per visit (s); FRQ, frequency; LAT, latency (s); OCC, occurrence; SAP, stretched attend posture; TOTACT, total activity, i.e. the sum of all frequencies; TOTARENA, total arena; TOTCORR; total corridor, i.e. the sum of all corridors.

**Supporting Table 2.** Results from the open field (OF) and elevated plus maze (EPM) tests in adult male Alko, alcohol (AA) and Alko, non-alcohol (ANA) rats.

| Parameters         | AA           | ANA          |      |
|--------------------|--------------|--------------|------|
| <b>A. OF test</b>  |              |              |      |
| Lat center         | 31.3 ± 7.3   | 23.4 ± 8.1   |      |
| Frq center         | 12.2 ± 1.9   | 12.0 ± 1.5   |      |
| Dur center         | 45.7 ± 6.0   | 36.6 ± 7.0   |      |
| Dur/Frq center     | 4.0 ± 0.4    | 2.9 ± 0.3    | *    |
| %Dur center        | 7.6 ± 1.0    | 6.1 ± 1.2    |      |
| Frq periphery      | 12.9 ± 1.7   | 13.3 ± 1.6   |      |
| Dur periphery      | 554.3 ± 6.0  | 563.4 ± 7.0  |      |
| Dur/Frq periphery  | 53.8 ± 9.5   | 51.1 ± 7.7   |      |
| Crossings          | 159.2 ± 9.5  | 152.4 ± 13.2 |      |
| TOTACT             | 25.1 ± 3.6   | 25.3 ± 3.1   |      |
| <b>B. EPM test</b> |              |              |      |
| Lat leave          | 8.1 ± 2.4    | 7.5 ± 1.6    |      |
| Lat open           | 60.7 ± 16.3  | 31.7 ± 8.5   |      |
| Frq open           | 3.2 ± 0.5    | 3.2 ± 0.7    |      |
| Dur open           | 47.0 ± 8.1   | 22.9 ± 4.5   | *    |
| Dur/Frq open       | 14.8 ± 2.1   | 7.5 ± 1.1    | **   |
| %Dur open          | 15.7 ± 2.7   | 7.6 ± 1.5    | *    |
| %Frq open          | 25.8 ± 3.7   | 16.5 ± 3.3   |      |
| Lat closed         | 19.2 ± 6.4   | 15.3 ± 5.9   |      |
| Frq closed         | 8.8 ± 0.4    | 15.1 ± 0.7   | **** |
| Dur closed         | 126.3 ± 15.7 | 181.8 ± 10.2 | *    |
| Dur/Frq closed     | 14.0 ± 1.5   | 12.5 ± 0.9   |      |
| %Dur closed        | 42.1 ± 5.2   | 60.6 ± 3.4   | *    |
| Frq center         | 12.3 ± 0.5   | 18.4 ± 0.9   | **** |
| Dur center         | 126.7 ± 10.6 | 95.3 ± 6.8   | *    |
| Dur/Frq center     | 10.3 ± 0.9   | 5.2 ± 0.4    | **** |
| %Dur center        | 42.2 ± 3.5   | 31.8 ± 2.3   | *    |
| TOTACT             | 12.0 ± 0.5   | 18.3 ± 0.9   | **** |

Behavioral parameters recorded during the 10-min trial of the OF test (A) and 5-min trial of the EPM test (B). Values represent mean ± SEM. Occurrence (OCC) is shown for the behaviors that were not performed by all animals in each group (n = 11-12 rats/group). No values are shown if OCC ≤ 3 animals. \*p ≤ 0.05, \*\*p < 0.01, \*\*\*p < 0.001, \*\*\*\*p < 0.0001 comparing AA and ANA rats (Mann-Whitney U-test); ###p < 0.001, ####p < 0.00001 comparing AA and ANA rats (Pearson Chi-Square test).

*Abbreviations:* DUR, duration (s); DUR/FRQ, duration per visit (s); FRQ, frequency; LAT, latency (s); OCC, occurrence; TOTACT, total activity, i.e. the sum of all frequencies.

**Supporting Table 3.** Results from the multivariate concentric square field™ (MCSF) test in adult male Sardinian alcohol-preferring (sP) and non-preferring (sNP) rats.

| Functional categories   | Parameters             | sP            | sNP          |              |      |
|-------------------------|------------------------|---------------|--------------|--------------|------|
| General activity        | TOTACT                 | 51.7 ± 7.1    | 99.4 ± 5.6   | ****         |      |
|                         | FRQ TOTCORR            | 25.1 ± 2.3    | 34.7 ± 1.8   | **           |      |
|                         | FRQ CENTER             | 10.9 ± 2.1    | 22.4 ± 1.7   | ***          |      |
|                         | DUR CENTER             | 401.3 ± 83.7  | 254.8 ± 15.0 |              |      |
|                         | DUR/FRQ CENTER         | 208.9 ± 100.0 | 13.0 ± 2.1   | **           |      |
|                         | OCC LEAVE CENTER       | 14/16         | 16/16        |              |      |
| Exploratory activity    | LAT LEAVE              | 201.3 ± 35.8  | 69.3 ± 14.4  | ***          |      |
|                         | DUR TOTCORR            | 612.5 ± 27.0  | 488.3 ± 10.9 | ***          |      |
|                         | DUR/FRQ TOTCORR        | 27.7 ± 3.2    | 14.7 ± 0.8   | ****         |      |
|                         | LAT HURDLE             | 489.3 ± 73.7  | 231.1 ± 38.0 | **           |      |
|                         | FRQ HURDLE             | 7.2 ± 1.1     | 7.1 ± 0.5    |              |      |
|                         | DUR HURDLE             | 103.8 ± 19.0  | 130.0 ± 8.7  | *            |      |
|                         | DUR/FRQ HURDLE         | 14.2 ± 1.4    | 18.6 ± 0.8   | **           |      |
|                         | OCC HURDLE             | 13/16         | 16/16        |              |      |
|                         | PHOTOCELL COUNTS       | 4.6 ± 1.0     | 7.6 ± 1.7    |              |      |
|                         | # ZONES VISITED        | 7.3 ± 0.8     | 10.0 ± 0.0   | **           |      |
|                         | OCC VIST ALL ZONES     | 6/16          | 16/16        | ###          |      |
|                         | REARING                | 56.3 ± 6.1    | 104.5 ± 4.4  | ****         |      |
|                         | Risk assessment        | LAT SLOPE     | 769.9 ± 82.0 | 307.3 ± 44.0 | ***  |
| FRQ SLOPE               |                        | 3.5 ± 0.6     | 7.8 ± 0.4    | ****         |      |
| DUR SLOPE               |                        | 20.8 ± 2.9    | 40.1 ± 2.2   | ****         |      |
| DUR/FRQ SLOPE           |                        | 7.2 ± 1.7     | 5.4 ± 0.4    |              |      |
| OCC SLOPE               |                        | 10/16         | 16/16        | ##           |      |
| LAT BRIDGE ENTRANCE     |                        | 827.1 ± 66.4  | 377.3 ± 51.1 | ***          |      |
| FRQ BRIDGE ENTRANCE     |                        | 3.0 ± 0.6     | 8.8 ± 0.5    | ****         |      |
| DUR BRIDGE ENTRANCE     |                        | 19.8 ± 4.6    | 44.9 ± 4.5   | **           |      |
| DUR/FRQ BRIDGE ENTRANCE |                        | 7.6 ± 1.8     | 5.2 ± 0.5    |              |      |
| OCC BRIDGE ENTRANCE     |                        | 9/16          | 16/16        | ##           |      |
| SAP TO CENTER           |                        | 8.0 ± 1.0     | 2.9 ± 0.6    | **           |      |
| OCC SAP CENTER          |                        | 14/16         | 7/16         | ##           |      |
| SAP TO SLOPE            |                        | 7.5 ± 0.9     | 1.7 ± 0.3    | ****         |      |
| OCC SAP TO SLOPE        |                        | 13/16         | 16/16        |              |      |
| Risk taking             |                        | LAT BRIDGE    | 793.1 ± 77.4 | 380.7 ± 51.3 | **   |
|                         |                        | FRQ BRIDGE    | 1.7 ± 0.3    | 5.0 ± 0.4    | **** |
|                         | DUR BRIDGE             | 40.1 ± 8.2    | 113.8 ± 8.1  | ****         |      |
|                         | DUR/FRQ BRIDGE         | 23.0 ± 2.8    | 23.6 ± 1.8   |              |      |
|                         | OCC BRIDGE             | 7/16          | 16/16        | ###          |      |
|                         | LAT CTRCI              | 546.8 ± 113.1 | 231.3 ± 62.8 |              |      |
|                         | FRQ CTRCI              | 3.3 ± 0.8     | 6.1 ± 0.8    | *            |      |
|                         | DUR CTRCI              | 8.1 ± 3.7     | 12.2 ± 1.8   | *            |      |
|                         | DUR/FRQ CTRCI          | 2.5 ± 0.9     | 2.5 ± 0.5    |              |      |
|                         | OCC CTRCI              | 9/16          | 16/16        | ##           |      |
| Shelter seeking         | LAT DCR                | 377.2 ± 63.8  | 291.2 ± 43.0 |              |      |
|                         | FRQ DCR                | 7.8 ± 0.6     | 7.6 ± 0.6    |              |      |
|                         | DUR DCR                | 162.1 ± 24.9  | 116.3 ± 6.4  |              |      |
|                         | DUR/FRQ DCR            | 20.2 ± 2.5    | 16.1 ± 1.2   |              |      |
|                         | OCC DCR                | 13/16         | 16/16        |              |      |
| Other                   | BODY WEIGHT            | 432.3 ± 7.8   | 414.4 ± 6.2  |              |      |
| Anxiety-like behavior   | DUR SHELTER/RISK INDEX | 0.57 ± 0.09   | 0.02 ± 0.04  | ***          |      |



|                         |                       |              |              |    |
|-------------------------|-----------------------|--------------|--------------|----|
| Impulsive-like behavior | SLOPE/BRIDGE INTERVAL | -0.09 ± 0.08 | -0.39 ± 0.19 | ** |
|-------------------------|-----------------------|--------------|--------------|----|

Behavioral parameters recorded during the 20-min trial of the MCSF test. Values represent mean ± SEM. Occurrence (OCC) is shown for the zones that were not visited by all animals in each group or the behaviors that were not performed by all animals in each group (n = 16 rats/group). No values are shown if OCC ≤ 3 animals. \*p ≤ 0.05, \*\*p < 0.01, \*\*\*p < 0.001, \*\*\*\*p < 0.0001 comparing sP and sNP rats (Mann-Whitney U-test); #p ≤ 0.05, ##p < 0.01, ###p < 0.001 comparing sP and sNP rats (Chi-Square test).

*Abbreviations:* CTRCI, central circle; DCR, dark corner room; DUR, duration (s); DUR/FRQ, duration per visit (s); FRQ, frequency; LAT, latency (s); OCC, occurrence; SAP, stretched attend posture; TOTACT, total activity, i.e. the sum of all frequencies; TOTARENA, total arena; TOTCORR; total corridor, i.e. the sum of all corridors.

**Supporting Table 4.** Results from the open field (OF) and elevated plus maze (EPM) tests in adult male Sardinian alcohol-preferring (sP) and non-preferring (sNP) rats.

| Parameters         | sP    |        | sNP   |        |      |
|--------------------|-------|--------|-------|--------|------|
| <b>A. OF test</b>  |       |        |       |        |      |
| Lat center         | 53.1  | ± 35.5 | 80.9  | ± 32.6 |      |
| Occ center         |       | 10/16  |       | 15/15  | ##   |
| Frq center         | 1.8   | ± 0.4  | 8.7   | ± 1.2  | ***  |
| Dur center         | 6.5   | ± 1.4  | 25.3  | ± 3.6  | ***  |
| Dur/Frq center     | 4.4   | ± 1.1  | 3.0   | ± 0.2  |      |
| %Dur center        | 0.7   | 0.2    | 4.2   | 0.6    | **** |
| Frq periphery      | 2.1   | ± 0.3  | 9.7   | ± 1.2  | **** |
| Dur periphery      | 595.9 | ± 1.2  | 574.7 | ± 3.6  | **** |
| Dur/Frq periphery  | 376.6 | ± 47.0 | 86.4  | ± 18.7 | **** |
| Crossings          | 43.3  | ± 13.0 | 223.7 | ± 11.1 | **** |
| TOTACT             | 3.3   | ± 0.7  | 18.3  | ± 2.4  | **** |
| <b>B. EPM test</b> |       |        |       |        |      |
| Lat leave          | 34.0  | ± 14.7 | 7.6   | ± 1.7  |      |
| Occ leave          |       | 15/16  |       | 16/16  |      |
| Lat open           | 71.2  | ± 25.9 | 43.6  | ± 10.3 |      |
| Occ open           |       | 6/16   |       | 16/16  | ###  |
| Frq open           | 2.0   | ± 0.5  | 4.6   | ± 0.6  | *    |
| Dur open           | 20.0  | ± 6.7  | 48.6  | ± 5.8  | *    |
| Dur/Frq open       | 10.5  | ± 2.0  | 11.2  | ± 0.8  |      |
| %Dur open          | 2.5   | ± 1.1  | 16.2  | ± 1.9  | **** |
| %Frq open          | 6.6   | 2.5    | 27.8  | 2.8    | **** |
| Lat closed         | 36.9  | ± 14.6 | 19.3  | ± 7.2  |      |
| Frq closed         | 8.6   | ± 1.0  | 11.4  | ± 0.6  | *    |
| Dur closed         | 171.5 | ± 14.7 | 118.5 | ± 5.5  | **   |
| Dur/Frq closed     | 25.9  | ± 5.0  | 10.9  | ± 0.9  | ***  |
| %Dur closed        | 53.6  | ± 5.8  | 39.5  | ± 1.8  | **   |
| Frq center         | 9.4   | ± 1.3  | 16.4  | ± 0.8  | ***  |
| Dur center         | 131.8 | ± 17.3 | 132.8 | ± 5.0  |      |
| Dur/Frq center     | 34.4  | ± 18.3 | 8.4   | ± 0.5  | **   |
| %Dur center        | 43.9  | ± 5.8  | 44.3  | ± 1.7  |      |
| TOTACT             | 8.8   | ± 1.2  | 16.1  | ± 0.9  | **** |

Behavioral parameters recorded during the 10-min trial of the OF test (A) and 5-min trial of the EPM test (B). Values represent mean ± SEM. Occurrence (OCC) is shown for the zones that were not visited by all animals in each group or the behaviors that were not performed by all animals in each group (n = 15-16 rats/group). No values are shown if OCC ≤ 3 animals. \*p ≤ 0.05, \*\*p < 0.01, \*\*\*p < 0.001, \*\*\*\*p < 0.0001 comparing sP and sNP rats (Mann-Whitney U-test); #p ≤ 0.05, ##p < 0.01, ###p < 0.001 comparing sP and sNP rats (Pearson Chi-Square test).

*Abbreviations:* DUR, duration (s); DUR/FRQ, duration per visit (s); FRQ, frequency; LAT, latency (s); OCC, occurrence; TOTACT, total activity, i.e. the sum of all frequencies.

**Supporting Table 5.** Results from the multivariate concentric square field™ (MCSF) test in adult male Indiana preferring (P) and Indiana non-preferring (NP) rats.

| Functional categories   | Parameters              | P             | NP           |    |
|-------------------------|-------------------------|---------------|--------------|----|
| General activity        | TOTACT                  | 103.0 ± 11.5  | 132.7 ± 6.4  | *  |
|                         | FRQ TOTCORR             | 34.3 ± 4.0    | 46.8 ± 2.6   | *  |
|                         | FRQ CENTER              | 21.1 ± 4.1    | 33.7 ± 2.0   | *  |
|                         | DUR CENTER              | 242.3 ± 32.4  | 285.8 ± 14.6 |    |
|                         | DUR/FRQ CENTER          | 19.1 ± 4.3    | 8.9 ± 0.9    | *  |
| Exploratory activity    | LAT LEAVE               | 66.8 ± 7.7    | 37.0 ± 5.8   | ** |
|                         | DUR TOTCORR             | 532.1 ± 16.8  | 452.8 ± 22.9 | *  |
|                         | DUR/FRQ TOTCORR         | 19.2 ± 3.1    | 9.9 ± 0.6    | ** |
|                         | LAT HURDLE              | 238.3 ± 53.0  | 170.9 ± 36.6 |    |
|                         | FRQ HURDLE              | 9.1 ± 1.1     | 9.8 ± 1.0    |    |
|                         | DUR HURDLE              | 124.3 ± 16.5  | 118.5 ± 12.2 |    |
|                         | DUR/FRQ HURDLE          | 15.2 ± 2.7    | 12.8 ± 1.5   |    |
|                         | PHOTOCELL COUNTS        | 7.2 ± 2.7     | 7.4 ± 1.0    |    |
|                         | # ZONES VISITED         | 9.5 ± 0.3     | 10.0 ± 0.0   |    |
|                         | OCC VIST ALL ZONES      | 9/12          | 12/12        |    |
|                         | REARING                 | 79.8 ± 6.7    | 70.3 ± 3.0   |    |
| Risk assessment         | LAT SLOPE               | 268.3 ± 48.1  | 262.0 ± 77.1 |    |
|                         | FRQ SLOPE               | 10.1 ± 1.0    | 9.8 ± 0.9    |    |
|                         | DUR SLOPE               | 41.0 ± 4.8    | 47.6 ± 5.9   |    |
|                         | DUR/FRQ SLOPE           | 4.3 ± 0.5     | 4.8 ± 0.4    |    |
|                         | LAT BRIDGE ENTRANCE     | 281.8 ± 49.3  | 319.7 ± 76.2 |    |
|                         | FRQ BRIDGE ENTRANCE     | 10.9 ± 1.1    | 10.0 ± 0.8   |    |
|                         | DUR BRIDGE ENTRANCE     | 50.7 ± 9.0    | 39.2 ± 3.7   |    |
|                         | DUR/FRQ BRIDGE ENTRANCE | 4.7 ± 0.5     | 4.1 ± 0.4    |    |
|                         | SAP TO CENTER           | - ± -         | - ± -        |    |
|                         | OCC SAP CENTER          | 3/12          | 0/12         |    |
|                         | SAP TO SLOPE            | 1.7 ± 0.4     | 2.0 ± 0.6    |    |
| Risk taking             | LAT BRIDGE              | 285.0 ± 49.3  | 321.9 ± 76.3 |    |
|                         | FRQ BRIDGE              | 5.9 ± 0.6     | 5.3 ± 0.4    |    |
|                         | DUR BRIDGE              | 123.6 ± 9.8   | 122.7 ± 8.9  |    |
|                         | DUR/FRQ BRIDGE          | 22.1 ± 1.8    | 23.5 ± 1.3   |    |
|                         | LAT CTRCI               | 293.0 ± 100.1 | 59.1 ± 17.0  |    |
|                         | FRQ CTRCI               | 8.1 ± 2.2     | 9.3 ± 1.0    |    |
|                         | DUR CTRCI               | 10.7 ± 2.3    | 13.5 ± 1.5   |    |
|                         | DUR/FRQ CTRCI           | 1.6 ± 0.2     | 1.5 ± 0.2    |    |
|                         | OCC CTRCI               | 9/12          | 12/12        |    |
| Shelter seeking         | LAT DCR                 | 316.5 ± 66.5  | 201.7 ± 56.6 |    |
|                         | FRQ DCR                 | 6.1 ± 1.0     | 8.0 ± 0.7    |    |
|                         | DUR DCR                 | 85.5 ± 13.7   | 119.8 ± 14.2 |    |
|                         | DUR/FRQ DCR             | 14.2 ± 1.0    | 15.9 ± 2.3   |    |
|                         | OCC DCR                 | 11/12         | 12/12        |    |
| Other                   | BODY WEIGHT             | 421.8 ± 9.9   | 425.9 ± 5.4  |    |
| Anxiety-like behavior   | DUR SHELTER/RISK INDEX  | -0.22 ± 0.09  | -0.03 ± 0.06 |    |
| Impulsive-like behavior | SLOPE/BRIDGE INTERVAL   | -0.07 ± 0.02  | -1.15 ± 1.03 |    |

Behavioral parameters recorded during the 20-min trial of the MCSF test. Values represent mean ± SEM. Occurrence (OCC) is shown for the zones that were not visited by all animals in each group or the behaviors that were not performed by all animals in each group (n = 12 rats/group). No values are shown if OCC ≤ 3 animals. \*p ≤ 0.05, \*\*p < 0.01 comparing P and NP rats (Mann-Whitney U-test); ##p < 0.01 comparing P and NP rats (Chi-Square test).

*Abbreviations:* CTRCI, central circle; DCR, dark corner room; DUR, duration (s); DUR/FRQ, duration per visit (s); FRQ, frequency; LAT, latency (s); OCC, occurrence; SAP, stretched attend posture; TOTACT, total activity, i.e. the sum of all frequencies; TOTARENA, total arena; TOTCORR; total corridor, i.e. the sum of all corridors.

**Supporting Table 6.** Results from the open field (OF) and elevated plus maze (EPM) tests in adult male Indiana preferring (P) and Indiana non-preferring (NP) rats.

| Parameters         | P     |        | NP    |        |     |
|--------------------|-------|--------|-------|--------|-----|
| <b>A. OF test</b>  |       |        |       |        |     |
| Lat center         | 76.2  | ± 20.1 | 49.3  | ± 27.8 |     |
| Occ center         |       | 11/12  |       | 12/12  |     |
| Frq center         | 16.3  | ± 2.2  | 10.4  | ± 1.5  |     |
| Dur center         | 70.8  | ± 14.3 | 45.4  | ± 8.8  |     |
| Dur/Frq center     | 4.0   | ± 0.5  | 4.2   | ± 0.7  |     |
| %Dur center        | 10.8  | 2.4    | 7.6   | 1.5    |     |
| Frq periphery      | 16.0  | ± 2.5  | 11.5  | ± 1.6  |     |
| Dur periphery      | 535.1 | ± 14.3 | 554.6 | ± 8.8  |     |
| Dur/Frq periphery  | 86.0  | ± 47.2 | 79.4  | ± 24.0 |     |
| Crossings          | 279.3 | ± 13.6 | 174.9 | ± 9.8  | *** |
| TOTACT             | 30.9  | ± 4.9  | 21.9  | ± 3.2  |     |
| <b>B. EPM test</b> |       |        |       |        |     |
| Lat leave          | 12.6  | ± 2.4  | 6.5   | ± 1.4  | *   |
| Lat open           | 46.0  | ± 17.3 | 45.9  | ± 18.1 |     |
| Occ open           |       | 11/12  |       | 10/12  |     |
| Frq open           | 3.1   | ± 0.5  | 3.9   | ± 0.8  |     |
| Dur open           | 29.0  | ± 4.9  | 41.3  | ± 7.5  |     |
| Dur/Frq open       | 9.8   | ± 0.8  | 11.2  | ± 1.1  |     |
| %Dur open          | 8.9   | ± 1.7  | 11.5  | ± 2.6  |     |
| %Frq open          | 19.5  | 3.4    | 20.8  | 4.5    |     |
| Lat closed         | 27.1  | ± 6.2  | 14.3  | ± 5.4  |     |
| Frq closed         | 11.2  | ± 0.7  | 11.5  | ± 0.7  |     |
| Dur closed         | 119.8 | ± 8.1  | 134.6 | ± 10.3 |     |
| Dur/Frq closed     | 11.0  | ± 0.7  | 11.8  | ± 0.9  |     |
| %Dur closed        | 39.9  | ± 2.7  | 44.9  | ± 3.4  |     |
| Frq center         | 14.8  | ± 0.9  | 15.1  | ± 0.7  |     |
| Dur center         | 153.4 | ± 6.1  | 131.3 | ± 5.9  | *   |
| Dur/Frq center     | 11.1  | ± 1.0  | 9.0   | ± 0.5  |     |
| %Dur center        | 51.1  | ± 2.0  | 43.8  | ± 2.0  | *   |
| TOTACT             | 14.0  | ± 0.8  | 14.8  | ± 0.8  |     |

Behavioral parameters recorded during the 10-min trial of the OF test (A) and 5-min trial of the EPM test (B). Values represent mean ± SEM. Occurrence (OCC) is shown for the zones that were not visited by all animals in each group or the behaviors that were not performed by all animals in each group (n = 12 rats/group). No values are shown if OCC ≤ 3 animals. \*p ≤ 0.05, \*\*\*p < 0.001 comparing P and NP rats (Mann-Whitney U-test); #p ≤ 0.05 comparing P and NP (Pearson Chi-Square test).

*Abbreviations:* DUR, duration (s); DUR/FRQ, duration per visit (s); FRQ, frequency; LAT, latency (s); OCC, occurrence; TOTACT, total activity, i.e. the sum of all frequencies.

**Supporting Table 7.** Results from the multivariate concentric square field™ (MCSF) test in adult male Indiana high alcohol drinking 1-2 (HAD1-2) and Indiana low alcohol drinking 1-2 (LAD1-2) rats.

| Functional categories | Parameters          |             | HAD          | LAD          |       |  |
|-----------------------|---------------------|-------------|--------------|--------------|-------|--|
| General activity      | TOTACT              | H1/L1       | 98.5 ± 3.7   | 99.6 ± 7.6   |       |  |
|                       |                     | H2/L2       | 83.3 ± 6.3   | 68.8 ± 5.3   |       |  |
|                       | FRQ TOTCORR         | H1/L1       | 31.6 ± 1.5   | 29.6 ± 2.7   |       |  |
|                       |                     | H2/L2       | 30.1 ± 1.9   | 24.3 ± 1.8   | *     |  |
|                       | FRQ CENTER          | H1/L1       | 17.6 ± 1.4   | 21.2 ± 2.9   |       |  |
|                       |                     | H2/L2       | 16.3 ± 2.1   | 12.3 ± 1.5   |       |  |
|                       | DUR CENTER          | H1/L1       | 184.0 ± 16.3 | 221.0 ± 22.2 |       |  |
|                       |                     | H2/L2       | 229.8 ± 18.0 | 230.3 ± 35.4 |       |  |
| DUR/FRQ CENTER        | H1/L1               | 10.9 ± 1.1  | 11.5 ± 0.9   |              |       |  |
|                       | H2/L2               | 16.2 ± 1.7  | 25.8 ± 9.0   |              |       |  |
| Exploratory activity  | LAT LEAVE           | H1/L1       | 48.0 ± 7.6   | 42.4 ± 7.6   |       |  |
|                       |                     | H2/L2       | 76.6 ± 7.1   | 86.3 ± 25.9  |       |  |
|                       | DUR TOTCORR         | H1/L1       | 448.1 ± 24.5 | 466.5 ± 25.3 |       |  |
|                       |                     | H2/L2       | 487.8 ± 32.7 | 447.1 ± 30.6 |       |  |
|                       | DUR/FRQ TOTCORR     | H1/L1       | 14.6 ± 1.2   | 17.0 ± 1.5   |       |  |
|                       |                     | H2/L2       | 17.3 ± 2.0   | 19.5 ± 2.1   |       |  |
|                       | LAT HURDLE          | H1/L1       | 145.3 ± 37.4 | 199.1 ± 75.2 |       |  |
|                       |                     | H2/L2       | 223.8 ± 34.3 | 403.0 ± 57.9 | *     |  |
|                       | FRQ HURDLE          | H1/L1       | 7.9 ± 0.7    | 6.9 ± 1.0    |       |  |
|                       |                     | H2/L2       | 6.8 ± 1.0    | 5.1 ± 0.5    |       |  |
|                       | DUR HURDLE          | H1/L1       | 90.0 ± 12.7  | 119.8 ± 14.1 |       |  |
|                       |                     | H2/L2       | 100.5 ± 17.0 | 108.9 ± 14.3 |       |  |
|                       | DUR/FRQ HURDLE      | H1/L1       | 11.3 ± 1.0   | 18.5 ± 1.4   | ***   |  |
|                       |                     | H2/L2       | 14.8 ± 1.0   | 22.2 ± 2.5   | **    |  |
|                       | PHOTOCELL COUNTS    | H1/L1       | 7.8 ± 1.4    | 6.6 ± 1.7    |       |  |
|                       |                     | H2/L2       | 6.6 ± 1.4    | 7.2 ± 1.0    |       |  |
|                       | # ZONES VISITED     | H1/L1       | 9.9 ± 0.1    | 9.8 ± 0.1    |       |  |
|                       |                     | H2/L2       | 9.4 ± 0.3    | 9.3 ± 0.4    |       |  |
| OCC VIST ALL ZONES    | H1/L1               |             | 11/12        | 10/12        |       |  |
|                       | H2/L2               |             | 7/12         | 9/12         |       |  |
| REARING               | H1/L1               | 90.1 ± 5.6  | 80.1 ± 5.5   |              |       |  |
|                       | H2/L2               | 45.1 ± 2.6  | 42.3 ± 3.1   |              |       |  |
| Risk assessment       | LAT SLOPE           | H1/L1       | 153.6 ± 31.7 | 141.8 ± 22.1 |       |  |
|                       |                     | H2/L2       | 258.5 ± 67.9 | 441.8 ± 56.6 | *     |  |
|                       | FRQ SLOPE           | H1/L1       | 11.4 ± 0.8   | 10.7 ± 0.9   |       |  |
|                       |                     | H2/L2       | 9.1 ± 1.2    | 7.7 ± 0.9    |       |  |
|                       | DUR SLOPE           | H1/L1       | 52.9 ± 5.6   | 56.1 ± 8.3   |       |  |
|                       |                     | H2/L2       | 75.2 ± 11.6  | 80.2 ± 15.1  |       |  |
|                       | DUR/FRQ SLOPE       | H1/L1       | 4.6 ± 0.4    | 5.2 ± 0.6    |       |  |
|                       |                     | H2/L2       | 8.2 ± 0.4    | 10.9 ± 1.3   |       |  |
|                       | OCC SLOPE           | H1/L1       |              | 12/12        | 12/12 |  |
|                       |                     | H2/L2       |              | 11/12        | 12/12 |  |
|                       | LAT BRIDGE ENTRANCE | H1/L1       | 172.8 ± 32.3 | 173.8 ± 36.7 |       |  |
|                       |                     | H2/L2       | 271.9 ± 69.0 | 524.7 ± 64.4 | **    |  |
| FRQ BRIDGE ENTRANCE   | H1/L1               | 12.7 ± 0.9  | 12.3 ± 1.2   |              |       |  |
|                       | H2/L2               | 9.0 ± 1.4   | 8.2 ± 1.0    |              |       |  |
| DUR BRIDGE ENTRANCE   | H1/L1               | 80.7 ± 17.0 | 70.0 ± 13.8  |              |       |  |

|                         |                        |       |              |               |     |
|-------------------------|------------------------|-------|--------------|---------------|-----|
|                         |                        | H2/L2 | 40.0 ± 4.4   | 54.0 ± 11.5   |     |
|                         | DUR/FRQ BRIDGE         | H1/L1 | 6.6 ± 1.5    | 5.7 ± 1.2     |     |
|                         | ENTRANCE               |       |              |               |     |
|                         |                        | H2/L2 | 5.1 ± 0.6    | 6.1 ± 0.8     |     |
|                         | OCC BRIDGE ENTRANCE    | H1/L1 | 12/12        | 12/12         |     |
|                         |                        | H2/L2 | 11/12        | 11/12         |     |
|                         | SAP TO CENTER          | H1/L1 | – ± –        | – ± –         |     |
|                         |                        | H2/L2 | 1.8 ± 0.3    | 3.7 ± 1.8     |     |
|                         | OCC SAP CENTER         | H1/L1 | 2/12         | 2/12          |     |
|                         |                        | H2/L2 | 6/12         | 6/12          |     |
|                         | SAP TO SLOPE           | H1/L1 | 0.8 ± 0.3    | 1.0 ± 0.3     |     |
|                         |                        | H2/L2 | 1.1 ± 0.5    | 1.8 ± 0.3     | *   |
| Risk taking             | LAT BRIDGE             | H1/L1 | 174.0 ± 32.3 | 175.8 ± 36.7  |     |
|                         |                        | H2/L2 | 274.9 ± 69.6 | 538.3 ± 62.0  | **  |
|                         | FRQ BRIDGE             | H1/L1 | 6.8 ± 0.5    | 6.7 ± 0.7     |     |
|                         |                        | H2/L2 | 4.5 ± 0.7    | 4.3 ± 0.6     |     |
|                         | DUR BRIDGE             | H1/L1 | 200.4 ± 22.2 | 154.3 ± 18.1  |     |
|                         |                        | H2/L2 | 113.9 ± 18.1 | 136.9 ± 26.8  |     |
|                         | DUR/FRQ BRIDGE         | H1/L1 | 29.8 ± 2.8   | 23.5 ± 2.3    |     |
|                         |                        | H2/L2 | 26.0 ± 2.5   | 30.6 ± 2.7    |     |
|                         | OCC BRIDGE             | H1/L1 | 12/12        | 12/12         |     |
|                         |                        | H2/L2 | 11/12        | 11/12         |     |
|                         | LAT CTRCI              | H1/L1 | 200.7 ± 52.8 | 316.8 ± 106.0 |     |
|                         |                        | H2/L2 | 363.6 ± 93.2 | 195.2 ± 109.4 |     |
|                         | FRQ CTRCI              | H1/L1 | 5.0 ± 0.6    | 8.3 ± 1.5     | *   |
|                         |                        | H2/L2 | 4.0 ± 1.5    | 3.0 ± 0.6     |     |
|                         | DUR CTRCI              | H1/L1 | 5.6 ± 1.0    | 14.2 ± 2.7    | **  |
|                         |                        | H2/L2 | 8.8 ± 3.3    | 9.6 ± 3.2     |     |
|                         | DUR/FRQ CTRCI          | H1/L1 | 1.1 ± 0.1    | 1.8 ± 0.3     | **  |
|                         |                        | H2/L2 | 2.6 ± 0.4    | 2.8 ± 0.5     |     |
|                         | OCC CTRCI              | H1/L1 | 11/12        | 11/12         |     |
|                         |                        | H2/L2 | 9/12         | 9/12          |     |
| Shelter seeking         | LAT DCR                | H1/L1 | 206.6 ± 39.6 | 253.3 ± 90.5  |     |
|                         |                        | H2/L2 | 273.5 ± 52.5 | 256.1 ± 105.4 |     |
|                         | FRQ DCR                | H1/L1 | 6.0 ± 0.4    | 5.2 ± 0.6     |     |
|                         |                        | H2/L2 | 6.5 ± 0.7    | 6.3 ± 0.9     |     |
|                         | DUR DCR                | H1/L1 | 133.8 ± 21.7 | 108.5 ± 22.1  |     |
|                         |                        | H2/L2 | 165.0 ± 24.1 | 164.6 ± 33.7  |     |
|                         | DUR/FRQ DCR            | H1/L1 | 21.7 ± 2.8   | 20.8 ± 3.8    |     |
|                         |                        | H2/L2 | 24.9 ± 2.7   | 24.9 ± 3.4    |     |
|                         | OCC DCR                | H1/L1 | 12/12        | 11/12         |     |
|                         |                        | H2/L2 | 12/12        | 11/12         |     |
| Other                   | BODY WEIGHT            | H1/L1 | 280.3 ± 5.3  | 311.3 ± 5.5   | *** |
|                         |                        | H2/L2 | 273.9 ± 5.9  | 310.2 ± 5.9   | *** |
| Anxiety-like behavior   | DUR SHELTER/RISK INDEX | H1/L1 | -0.21 ± 0.12 | -0.20 ± 0.09  |     |
|                         |                        | H2/L2 | 0.10 ± 0.14  | 0.08 ± 0.16   |     |
| Impulsive-like behavior | SLOPE/BRIDGE INTERVAL  | H1/L1 | -0.27 ± 0.23 | -0.23 ± 0.15  |     |
|                         |                        | H2/L2 | -0.09 ± 0.03 | -0.33 ± 0.14  |     |

Behavioral parameters recorded during the 20-min trial of the MCSF test. Values represent mean ± SEM. Occurrence (OCC) is shown for the zones that were not visited by all animals

in each group or the behaviors that were not performed by all animals in each group (n = 12 rats/group). No values are shown if OCC  $\leq$  3 animals. \*p  $\leq$  0.05, \*\*p < 0.01, \*\*\*p < 0.001 comparing the respective replicate line of HAD and LAD rats (Mann-Whitney U-test).

*Abbreviations:* CTRCI, central circle; DCR, dark corner room; DUR, duration (s); DUR/FRQ, duration per visit (s); FRQ, frequency; LAT, latency (s); OCC, occurrence; SAP, stretched attend posture; TOTACT, total activity, i.e. the sum of all frequencies; TOTARENA, total arena; TOTCORR; total corridor, i.e. the sum of all corridors.



**Supporting Table 8.** Results from the open field (OF) and elevated plus maze (EPM) tests in adult male Indiana high alcohol drinking 1-2 (HAD1-2) and Indiana low alcohol drinking 1-2 (LAD1-2) rats.

| Parameters         |       | HAD   |        | LAD   |        |      |
|--------------------|-------|-------|--------|-------|--------|------|
| <b>A. OF test</b>  |       |       |        |       |        |      |
| Lat center         | H1/L1 | 105.3 | ± 49.3 | 52.4  | ± 12.0 |      |
|                    | H2/L2 | 183.7 | ± 31.8 | 186.4 | ± 63.7 |      |
| Occ center         | H1/L1 |       | 11/11  |       | 11/11  |      |
|                    | H2/L2 |       | 11/12  |       | 8/11   |      |
| Frq center         | H1/L1 | 4.1   | ± 0.8  | 15.1  | ± 1.8  | ***  |
|                    | H2/L2 | 5.5   | ± 0.9  | 2.6   | ± 0.5  | *    |
| Dur center         | H1/L1 | 15.2  | ± 4.3  | 76.1  | ± 13.5 | **** |
|                    | H2/L2 | 21.8  | ± 5.9  | 14.1  | ± 3.6  |      |
| Dur/Frq center     | H1/L1 | 3.4   | ± 0.5  | 5.3   | ± 0.7  | *    |
|                    | H2/L2 | 3.7   | ± 0.5  | 5.5   | ± 0.9  |      |
| %Dur center        | H1/L1 | 2.5   | ± 0.7  | 12.7  | ± 2.2  | **** |
|                    | H2/L2 | 3.3   | ± 0.9  | 1.7   | ± 0.5  |      |
| Frq periphery      | H1/L1 | 5.3   | ± 0.9  | 15.8  | ± 1.7  | ***  |
|                    | H2/L2 | 5.9   | ± 0.9  | 3.0   | ± 0.6  | *    |
| Dur periphery      | H1/L1 | 584.8 | ± 4.3  | 525.7 | ± 13.7 | **** |
|                    | H2/L2 | 580.0 | ± 5.7  | 589.7 | ± 3.3  |      |
| Dur/Frq periphery  | H1/L1 | 154.5 | ± 29.4 | 47.2  | ± 14.9 | ***  |
|                    | H2/L2 | 154.6 | ± 44.6 | 302.8 | ± 62.1 | *    |
| Crossings          | H1/L1 | 96.5  | ± 8.5  | 174.1 | ± 15.8 | ***  |
|                    | H2/L2 | 161.1 | ± 14.1 | 67.5  | ± 13.0 | ***  |
| TOTACT             | H1/L1 | 9.4   | ± 1.7  | 30.9  | ± 3.5  | ***  |
|                    | H2/L2 | 10.9  | ± 1.9  | 4.9   | ± 1.1  | *    |
| <b>B. EPM test</b> |       |       |        |       |        |      |
| Lat leave          | H1/L1 | 8.2   | ± 2.9  | 14.7  | ± 3.1  |      |
|                    | H2/L2 | 17.1  | ± 5.2  | 10.0  | ± 3.1  |      |
| Lat open           | H1/L1 | 51.6  | ± 15.0 | 77.2  | ± 21.7 |      |
|                    | H2/L2 | 130.9 | ± 32.5 | 44.1  | ± 26.5 | *    |
| Occ open           | H1/L1 |       | 11/12  |       | 11/12  |      |
|                    | H2/L2 |       | 9/12   |       | 7/12   |      |
| Frq open           | H1/L1 | 2.6   | ± 0.5  | 2.9   | ± 0.5  |      |
|                    | H2/L2 | 1.8   | ± 0.2  | 2.1   | ± 0.5  |      |
| Dur open           | H1/L1 | 30.1  | ± 7.6  | 33.4  | ± 6.6  |      |
|                    | H2/L2 | 18.9  | ± 3.8  | 35.6  | ± 4.9  | *    |
| Dur/Frq open       | H1/L1 | 11.1  | ± 1.1  | 10.7  | ± 0.6  |      |
|                    | H2/L2 | 10.2  | ± 1.4  | 20.1  | ± 3.1  | *    |
| %Dur open          | H1/L1 | 9.2   | ± 2.5  | 10.2  | ± 2.2  |      |
|                    | H2/L2 | 4.7   | ± 1.3  | 6.9   | ± 2.0  |      |
| %Frq open          | H1/L1 | 22.0  | ± 3.9  | 21.3  | ± 3.9  |      |
|                    | H2/L2 | 10.9  | ± 2.3  | 12.0  | ± 3.6  |      |
| Lat closed         | H1/L1 | 18.8  | ± 6.6  | 29.6  | ± 9.4  |      |
|                    | H2/L2 | 19.7  | ± 6.0  | 27.3  | ± 7.6  |      |
| Frq closed         | H1/L1 | 7.8   | ± 0.8  | 9.5   | ± 0.6  |      |
|                    | H2/L2 | 10.2  | ± 0.4  | 9.2   | ± 1.1  |      |
| Dur closed         | H1/L1 | 172.9 | ± 15.5 | 124.7 | ± 11.6 | *    |
|                    | H2/L2 | 164.5 | ± 9.5  | 175.4 | ± 9.6  |      |
| Dur/Frq closed     | H1/L1 | 26.4  | ± 5.3  | 13.5  | ± 1.4  | **   |
|                    | H2/L2 | 16.4  | ± 1.1  | 22.5  | ± 3.3  |      |
| %Dur closed        | H1/L1 | 57.6  | ± 5.2  | 41.6  | ± 3.9  | *    |

|                |       |             |             |    |
|----------------|-------|-------------|-------------|----|
| Frq center     | H2/L2 | 54.8 ± 3.2  | 58.5 ± 3.2  |    |
|                | H1/L1 | 10.4 ± 1.0  | 12.6 ± 0.7  |    |
| Dur center     | H2/L2 | 11.7 ± 0.5  | 10.4 ± 1.1  |    |
|                | H1/L1 | 99.6 ± 12.2 | 144.6 ± 7.9 | ** |
| Dur/Frq center | H2/L2 | 121.3 ± 9.9 | 103.9 ± 9.3 |    |
|                | H1/L1 | 9.9 ± 1.0   | 11.8 ± 0.9  |    |
| %Dur center    | H2/L2 | 10.8 ± 1.1  | 10.3 ± 0.7  |    |
|                | H1/L1 | 33.2 ± 4.1  | 48.2 ± 2.6  | ** |
| TOTACT         | H2/L2 | 40.4 ± 3.3  | 34.6 ± 3.1  |    |
|                | H1/L1 | 10.3 ± 1.0  | 12.2 ± 0.7  |    |
|                | H2/L2 | 11.5 ± 0.5  | 10.4 ± 1.1  |    |

Behavioral parameters recorded during the 10-min trial of the OF test (**A**) and 5-min trial of the EPM test (**B**). Values represent mean ± SEM. Occurrence (OCC) is shown for the zones that were not visited by all animals in each group or the behaviors that were not performed by all animals in each group (n = 11-12 rats/group). No values are shown if OCC ≤ 3 animals. \*p ≤ 0.05, \*\*p < 0.01, \*\*\*p < 0.001, \*\*\*\*p < 0.0001 comparing the respective replicate line of HAD and LAD rats (Mann-Whitney U-test); #p ≤ 0.05 comparing the respective replicate line of HAD and LAD rats (Pearson Chi-Square test).

*Abbreviations:* DUR, duration (s); DUR/FRQ, duration per visit (s); FRQ, frequency; LAT, latency (s); OCC, occurrence; TOTACT, total activity, i.e. the sum of all frequencies.

**Supporting Table 9.** Results from the multivariate concentric square field™ (MCSF) test in adult male Wistar and N/Nih rats.

| Functional categories   | Parameters              | Wistar       | N/Nih         |
|-------------------------|-------------------------|--------------|---------------|
| General activity        | TOTACT                  | 137.0 ± 7.1  | 108.1 ± 7.7   |
|                         | FRQ TOTCORR             | 45.4 ± 3.5   | 35.0 ± 2.1    |
|                         | FRQ CENTER              | 21.5 ± 3.6   | 18.4 ± 2.0    |
|                         | DUR CENTER              | 168.8 ± 24.1 | 164.3 ± 10.7  |
|                         | DUR/FRQ CENTER          | 11.2 ± 1.9   | 9.4 ± 0.5     |
| Exploratory activity    | LAT LEAVE               | 18.2 ± 4.0   | 23.4 ± 3.9    |
|                         | DUR TOTCORR             | 458.4 ± 12.3 | 401.9 ± 23.4  |
|                         | DUR/FRQ TOTCORR         | 11.0 ± 1.1   | 12.0 ± 1.1    |
|                         | LAT HURDLE              | 84.7 ± 16.7  | 218.7 ± 31.7  |
|                         | FRQ HURDLE              | 13.8 ± 1.1   | 8.6 ± 0.6     |
|                         | DUR HURDLE              | 151.5 ± 14.1 | 107.5 ± 7.9   |
|                         | DUR/FRQ HURDLE          | 11.2 ± 0.8   | 12.9 ± 0.9    |
|                         | OCC HURDLE              | 12/12        | 12/12         |
|                         | PHOTOCELL COUNTS        | 10.1 ± 1.5   | 6.3 ± 1.2     |
|                         | # ZONES VISITED         | 9.4 ± 0.3    | 9.9 ± 0.1     |
|                         | OCC VIST ALL ZONES      | 9/12         | 11/12         |
|                         | REARING                 | 81.9 ± 3.1   | 87.0 ± 4.5    |
| Risk assessment         | LAT SLOPE               | 109.6 ± 22.1 | 199.7 ± 35.4  |
|                         | FRQ SLOPE               | 17.0 ± 1.5   | 12.6 ± 1.1    |
|                         | DUR SLOPE               | 68.1 ± 10.7  | 64.3 ± 4.5    |
|                         | DUR/FRQ SLOPE           | 3.9 ± 0.3    | 5.4 ± 0.5     |
|                         | OCC SLOPE               | 12/12        | 12/12         |
|                         | LAT BRIDGE ENTRANCE     | 134.4 ± 23.9 | 205.3 ± 35.3  |
|                         | FRQ BRIDGE ENTRANCE     | 17.6 ± 1.7   | 13.1 ± 1.3    |
|                         | DUR BRIDGE ENTRANCE     | 82.3 ± 12.2  | 71.9 ± 8.0    |
|                         | DUR/FRQ BRIDGE ENTRANCE | 4.7 ± 0.5    | 5.7 ± 0.6     |
|                         | OCC BRIDGE ENTRANCE     | 12/12        | 12/12         |
|                         | SAP TO CENTER           | 7.7 ± 2.5    | 2.1 ± 0.4     |
|                         | OCC SAP CENTER          | 6/12         | 7/12          |
|                         | SAP TO SLOPE            | 0.3 ± 0.1    | 0.5 ± 0.2     |
| Risk taking             | LAT BRIDGE              | 135.8 ± 23.9 | 207.5 ± 35.6  |
|                         | FRQ BRIDGE              | 9.3 ± 1.0    | 6.6 ± 0.7     |
|                         | DUR BRIDGE              | 185.7 ± 20.4 | 167.3 ± 13.9  |
|                         | DUR/FRQ BRIDGE          | 20.1 ± 1.0   | 26.4 ± 1.9    |
|                         | LAT CTRCI               | 132.8 ± 53.9 | 396.2 ± 105.0 |
|                         | FRQ CTRCI               | 5.7 ± 1.1    | 6.1 ± 1.3     |
|                         | DUR CTRCI               | 7.6 ± 1.9    | 11.8 ± 1.7    |
|                         | DUR/FRQ CTRCI           | 1.4 ± 0.2    | 2.3 ± 0.2     |
|                         | OCC CTRCI               | 11/12        | 11/12         |
| Shelter seeking         | LAT DCR                 | 43.0 ± 13.3  | 171.4 ± 55.3  |
|                         | FRQ DCR                 | 9.6 ± 1.0    | 8.3 ± 0.8     |
|                         | DUR DCR                 | 103.8 ± 14.3 | 211.9 ± 32.4  |
|                         | DUR/FRQ DCR             | 10.9 ± 0.8   | 26.4 ± 4.4    |
|                         | OCC DCR                 | 9/12         | 12/12         |
| Other                   | BODY WEIGHT             | 476.9 ± 6.0  | 327.5 ± 11.8  |
| Anxiety-like behavior   | DUR SHELTER/RISK INDEX  | -0.20 ± 0.07 | 0.07 ± 0.10   |
| Impulsive-like behavior | SLOPE/BRIDGE INTERVAL   | -0.40 ± 0.20 | -0.06 ± 0.02  |

Behavioral parameters recorded during the 20-min trial of the MCSF test. Values represent mean  $\pm$  SEM. Occurrence (OCC) is shown for the zones that were not visited by all animals in each group or the behaviors that were not performed by all animals in each group (n = 12 rats/group). No values are shown if OCC  $\leq$  3 animals.

*Abbreviations:* CTRCI, central circle; DCR, dark corner room; DUR, duration (s); DUR/FRQ, duration per visit (s); FRQ, frequency; LAT, latency (s); OCC, occurrence; SAP, stretched attend posture; TOTACT, total activity, i.e. the sum of all frequencies; TOTARENA, total arena; TOTCORR; total corridor, i.e. the sum of all corridors.

**Supporting Table 10.** Results from the open field (OF) and elevated plus maze (EPM) tests in adult male Wistar and N/Nih rats.

| Parameters         | Wistar       | N/Nih        |
|--------------------|--------------|--------------|
| <b>A. OF test</b>  |              |              |
| Lat center         | 56.1 ± 45.1  | 82.4 ± 27.2  |
| Frq center         | 18.3 ± 3.0   | 7.7 ± 1.4    |
| Dur center         | 45.4 ± 6.7   | 30.2 ± 6.0   |
| Dur/Frq center     | 2.8 ± 0.2    | 3.9 ± 0.1    |
| %Dur center        | 7.6 ± 1.1    | 5.0 ± 1.0    |
| Frq periphery      | 19.3 ± 3.1   | 8.9 ± 1.5    |
| Dur periphery      | 554.6 ± 6.7  | 569.8 ± 6.0  |
| Dur/Frq periphery  | 56.1 ± 19.3  | 86.1 ± 14.9  |
| Crossings          | 352.8 ± 11.3 | 144.2 ± 15.1 |
| TOTACT             | 37.6 ± 6.1   | 16.6 ± 3.0   |
| <b>B. EPM test</b> |              |              |
| Lat leave          | 4.9 ± 1.7    | 6.0 ± 1.4    |
| Lat open           | 34.7 ± 22.1  | 50.7 ± 25.9  |
| Occ open           | 10/10        | 7/12         |
| Frq open           | 4.7 ± 0.7    | 3.1 ± 0.7    |
| Dur open           | 42.0 ± 6.6   | 30.1 ± 7.4   |
| Dur/Frq open       | 8.6 ± 0.7    | 10.0 ± 1.4   |
| %Dur open          | 14.0 ± 2.2   | 5.9 ± 2.0    |
| %Frq open          | 21.0 ± 2.7   | 13.5 ± 4.2   |
| Lat closed         | 16.3 ± 5.5   | 17.4 ± 8.2   |
| Frq closed         | 17.0 ± 0.5   | 11.6 ± 0.8   |
| Dur closed         | 135.6 ± 9.9  | 174.1 ± 14.3 |
| Dur/Frq closed     | 8.1 ± 0.6    | 15.9 ± 2.0   |
| %Dur closed        | 45.2 ± 3.3   | 58.0 ± 4.8   |
| Frq center         | 21.8 ± 0.7   | 13.7 ± 0.8   |
| Dur center         | 122.4 ± 4.0  | 108.4 ± 10.8 |
| Dur/Frq center     | 5.7 ± 0.2    | 7.8 ± 0.6    |
| %Dur center        | 40.8 ± 1.3   | 36.1 ± 3.6   |
| TOTACT             | 21.7 ± 0.8   | 13.4 ± 0.7   |

Behavioral parameters recorded during the 10-min trial of the OF test (A) and 5-min trial of the EPM test (B). Values represent mean ± SEM. Occurrence (OCC) is shown for the zones that were not visited by all animals in each group or the behaviors that were not performed by all animals in each group (n = 10-12 rats/group). No values are shown if OCC ≤ 3 animals. *Abbreviations:* DUR, duration (s); DUR/FRQ, duration per visit (s); FRQ, frequency; LAT, latency (s); OCC, occurrence; TOTACT, total activity, i.e. the sum of all frequencies.

## **EXPANDED DISCUSSION**

### **Consistency of results comparing the MCSF, OF and EPM tests**

The present results add to previous findings (Augustsson et al., 2005; Augustsson and Meyerson, 2004; Roman and Colombo, 2009; Roman et al., 2006; Roman et al., 2007) demonstrating that the MCSF provides more information compared to the OF and EPM tests. The MCSF contains two risk areas, i.e. the illuminated, elevated bridge construction and the central part (CENTRAL CIRCLE) of the open center field (Meyerson et al., 2006; Roman and Colombo, 2009). These two areas correspond to the open arms in the EPM test and the center of the OF, respectively. In the interpretations, the construct of anxiety-like behavior combines a number of measures, including activity, risk taking and shelter seeking. Similarly, interpretations as to impulsive-like behavior are made based on the relation between exploration, risk assessment and risk taking. There is a different approach with the MCSF test compared to other commonly used tests (EPM, OF, light-dark box, operant paradigms etc.). The diversity of choices in the MCSF allows the expression of a greater behavioral repertoire in the animals. The multivariate strategy, using statistical approaches including the PLS and trend analysis, emphasizes the overall behavioral profile of the animals rather than a single construct such as anxiety.

## **REFERENCES**

- Alsö J, Roman E, Olszewski PK, Jonsson P, Fredriksson R, Levine AS, Meyerson BJ, Hulting AL, Lindblom J, Schiöth HB (2009) Inverse association of high-fat diet preference and anxiety-like behavior: a putative role for urocortin 2. *Genes Brain Behav* 8:193-202.
- Augustsson H (2004) Ethoexperimental studies of behaviour in wild and laboratory mice. Risk assessment, emotional reactivity and animal welfare. *Acta Universitatis Agriculturae Sueciae Veterinaria*, 174:7-62.
- Augustsson H, Dahlborn K, Meyerson BJ (2005) Exploration and risk assessment in female wild house mice (*Mus musculus musculus*) and two laboratory strains. *Physiol Behav* 84:265-277.
- Augustsson H, Meyerson BJ (2004) Exploration and risk assessment: a comparative study of male house mice (*Mus musculus musculus*) and two laboratory strains. *Physiol Behav* 81:685-698.

Meyerson BJ, Augustsson H, Berg M, Roman E (2006) The concentric square field: a multivariate test arena for analysis of explorative strategies. *Behav Brain Res* 168:100-113.

Roman E, Colombo G (2009) Lower risk taking and exploratory behavior in alcohol-preferring sP rats than in alcohol nonpreferring sNP rats in the multivariate concentric square field<sup>TM</sup> (MCSF) test. *Behav Brain Res* 205:249-258.

Roman E, Gustafsson L, Berg M, Nylander I (2006) Behavioral profiles and stress-induced corticosteroid secretion in male Wistar rats subjected to short and prolonged periods of maternal separation. *Horm Behav* 50:736-747.

Roman E, Meyerson BJ, Hyytiä P, Nylander I (2007) The multivariate concentric square field test reveals different behavioural profiles in male AA and ANA rats with regard to risk taking and environmental reactivity. *Behav Brain Res* 183:195-205.

Wallén-Mackenzie A, Nordenankar K, Fejgin K, Lagerström MC, Emilsson L, Fredriksson R, Wass C, Andersson D, Egecioglu E, Andersson M, Strandberg J, Lindhe O, Schiöth HB, Chergui K, Hanse E, Langström B, Fredriksson A, Svensson L, Roman E, Kullander K (2009) Restricted cortical and amygdaloid removal of vesicular glutamate transporter 2 in preadolescent mice impacts dopaminergic activity and neuronal circuitry of higher brain function. *J Neurosci* 29:2238-2251.
